# Supplementary material for: Mutation in the key enzyme of sialic acid biosynthesis causes severe glomerular proteinuria and is rescued by N-acetylmannosamine
Source: JCI journal article supplement (doi:10.1172/jci30954), 2007-06-01
Supplement: sd1 [file 1]

# Supplementary Figure 1

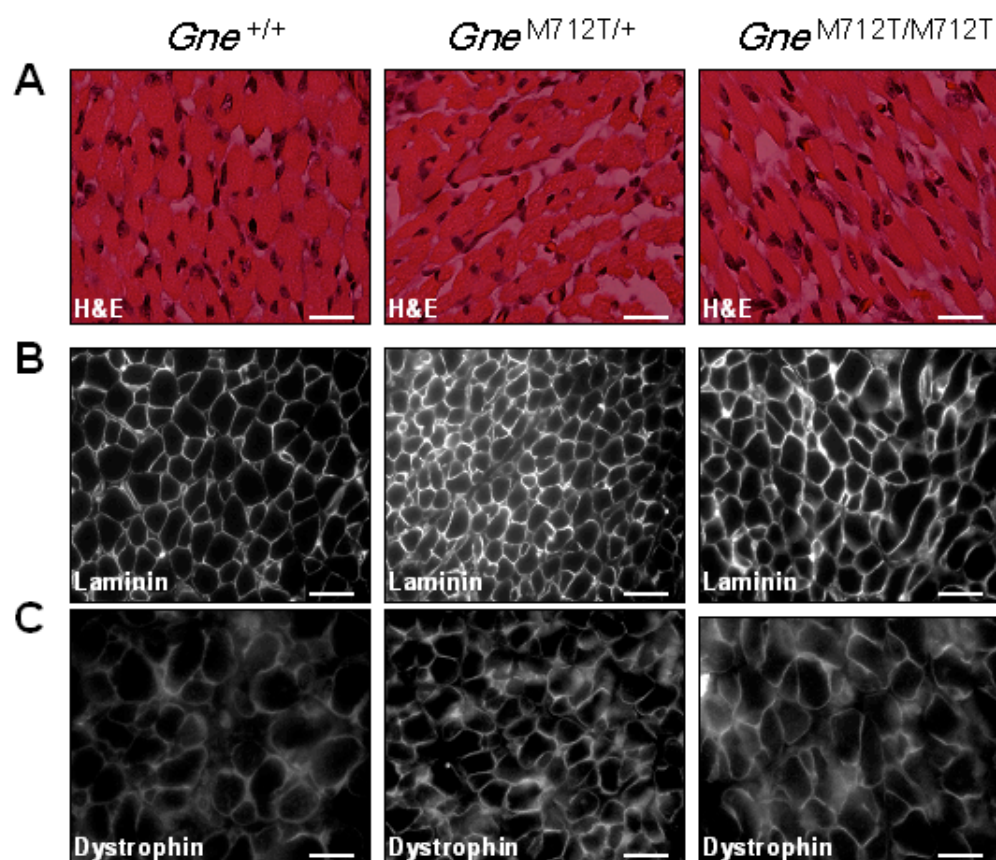

## Supplementary Figure 1: Muscle histology.

(A-C) Representative sections of skeletal muscle from wild type *Gne*<sup>+/+</sup>, *Gne*<sup>M712T/+</sup>, and homozygous mutated littermates at age P2. Scale bars, 20μm. (A) H&E stained sections show no difference in muscle histology among genotypes. (B) Laminin (extracellular component of the dystrophin-glycoprotein complex (DGC)) and (C) Dystrophin (intracellular component of the DGC) were normally distributed in all genotypes.

**A**

| Genotype |     | +/+ | +/+ | +/- | +/- | +/- | -/- | -/-                 |  |
|----------|-----|-----|-----|-----|-----|-----|-----|---------------------|--|
| Mw (kDa) | 250 |     |     |     |     |     |     | ← Laminin $\beta$ 1 |  |
|          | 148 |     |     |     |     |     |     |                     |  |
|          | 42  |     |     |     |     |     |     | ← VSMA              |  |
|          | 60  |     |     |     |     |     |     | ← Desmin            |  |
|          | 42  |     |     |     |     |     |     | ← $\beta$ -actin    |  |

**B**

| Gene           | $Gne^{+/+}$ (%) | $Gne^{M12T/M12T}$ (%) | p-value |
|----------------|-----------------|-----------------------|---------|
| <i>Gne</i>     | 100             | 115                   | 0.28    |
| <i>Pecam-1</i> | 100             | 95                    | 0.69    |
| <i>Col4A3</i>  | 100             | 98                    | 0.96    |

(A) Representative immunoblots of kidney extracts (age P1) labeled with antibodies to GBM (laminin  $\beta$ 1) and glomerular mesangial cell (VSMA and desmin) markers. After normalization to  $\beta$ -actin ( $\sim 41$  kDa), no difference in intensity or size was apparent in any of these markers between *Gne*<sup>+/+</sup> (+/+), *Gne*<sup>M712T/+</sup> (+/-), or *Gne*<sup>M712T/M712T</sup> (-/-): Laminin  $\beta$ 1 ( $\sim 210$  kDa), VSMA ( $\sim 42$  kDa; n=3, p=0.65 (comparison of *Gne*<sup>+/+</sup> and *Gne*<sup>M712T/M712T</sup>)), and Desmin ( $\sim 53$  kDa; n=3, p=0.93 (comparison of *Gne*<sup>+/+</sup> and *Gne*<sup>M712T/M712T</sup>)). (B) mRNA expression levels in kidney of *Gne*, *CD31/Pecam-1* (endothelial cell marker), and *Col4A3* (GBM marker) were measured by real-time qPCR (n=3) and normalized to  $\beta$ -actin expression levels and *Gne*<sup>+/+</sup> expression levels for each gene were set at 100%. None of the tested genes differed significantly in mRNA expression in tissues of *Gne*<sup>M712T/M712T</sup> compared to wild type littermates.

## Supplementary Figure 3

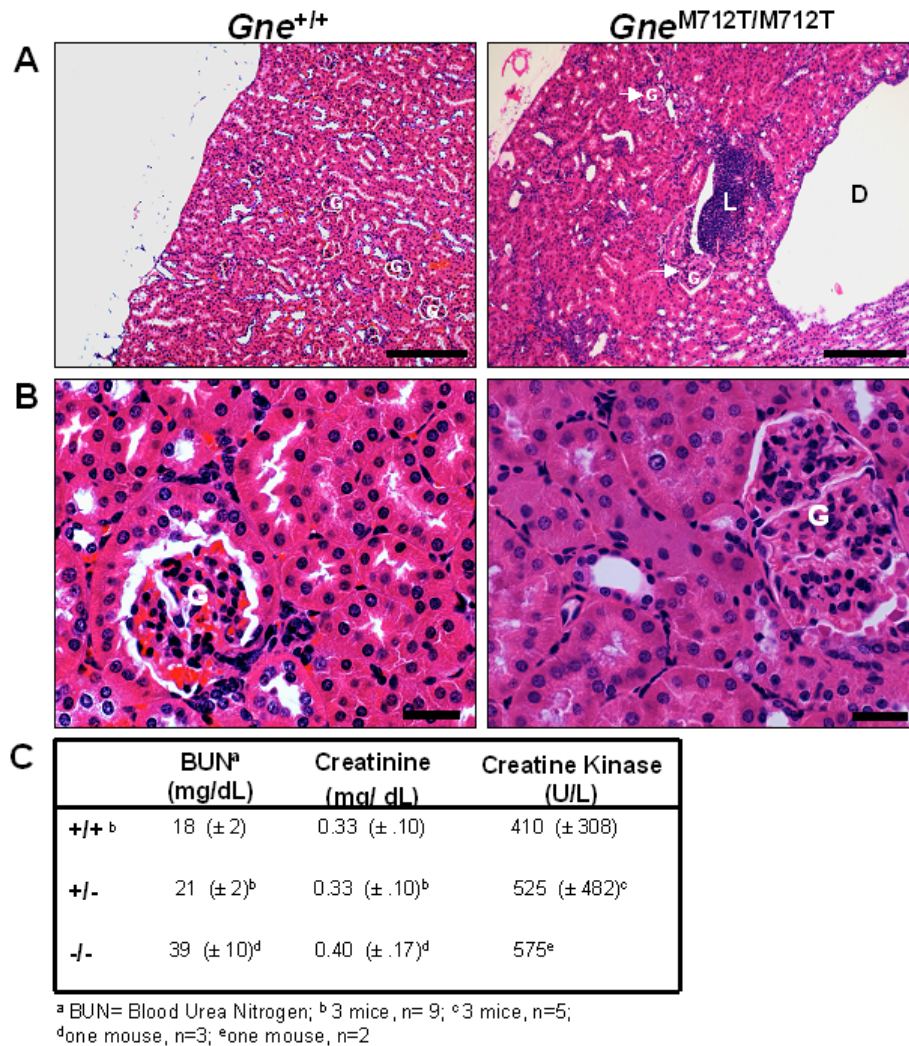

### Supplementary Figure 3: Histological kidney analyses.

(**A** and **B**) Representative H&E stained kidney sections of the only *Gne*<sup>M712T/M712T</sup> (male) survivor (right panels) and a wild type male littermate (left panels), euthanized at age 8.5 months. (**A**) Low magnification views demonstrated markedly cystic dilations of the renal pelvis (D), multifocal lymphoplasmacytic infiltrates (L), and expanded glomeruli (G) (arrows in right panel) in the *Gne*<sup>M712T/M712T</sup> mouse, which were not present in its wild type littermate. Scale bars, 500µm. (**B**) Representative higher magnification images demonstrated multiple *Gne*<sup>M712T/M712T</sup> glomeruli with mild to moderate mesangial matrix increase, and/or mesangial cell hyperplasia/hypertrophy (representative expanded glomerulus, right panel). These abnormalities were not observed in the wild type mouse (left panel). Scale bars, 100µm. (**C**) Average serum metabolite levels in weaned mice age 4 months. +/+ : *Gne*<sup>+/+</sup>; +/- : *Gne*<sup>M712T/+</sup>; -/- : *Gne*<sup>M712T/M712T</sup> (the only mutant survivor without ManNAc treatment).
